# Supplementary material
Source: PubMed Central journal article supplement (PMC5269473)

## **Supplementary Information for:**

### **Integrating GWAS and co-expression network data identifies causal BMD genes**

Gina Calabrese<sup>1</sup>, Larry Mesner<sup>1</sup>, Joseph Stains<sup>2</sup>, Steven M. Tommasini<sup>3</sup>, Mark C. Horowitz<sup>3</sup>, Clifford J. Rosen<sup>4</sup>, Charles R. Farber<sup>1,5</sup>

<sup>1</sup>Center for Public Health Genomics, University of Virginia, Charlottesville, VA 22908, USA

<sup>2</sup>University of Maryland School of Medicine, Department of Orthopaedics, Baltimore, MD 21201, USA

<sup>3</sup>Yale School of Medicine, Department of Orthopaedics and Rehabilitation, New Haven, CT 06520-8071, USA

<sup>4</sup>Maine Medical Center Research Institute, 81 Research Drive, Scarborough, Maine 04074, USA

<sup>5</sup>Departments of Public Health Sciences and Biochemistry and Molecular Genetics, University of Virginia, Charlottesville, VA 22908, USA

Running Title: Informing BMD GWAS using networks

Correspondence should be addressed to:

Charles R. Farber  
Center for Public Health Genomics  
P.O. Box 800717  
University of Virginia  
Charlottesville, VA 22908  
Tel: 434-243-8584  
Fax: 434-982-1815  
Email: crf2s@virginia.edu

**Table S1, related to Figure 1.** List of 64 BMD GWAS SNPs used in the analysis from Estrada et al. 2012.

**Table S2, related to Figure 1.** The BMD GWAS Implicated Gene list (BGIG).

**Table S3, related to Figure 1.** List of significant gene ontology terms in the BGIG.

**Table S4, related to STAR Methods.** Primer and siRNA sequences

| <b>Primers or siRNAs</b>                 | <b>Sequence</b>                        |
|------------------------------------------|----------------------------------------|
| <b>Genotyping primer: Common-lox-P-F</b> | GAGATGGCGCAACGCAATTAAT                 |
| <b>Genotyping primer: Mark3-3'R</b>      | CTTTGCAGGACCCCAACAGG                   |
| <b>Genotyping primer: Common-en2-3'R</b> | CCAACTGACCTTGGGCAAGAACAT               |
| <b>Genotyping primer: Mark3-5' F</b>     | GCTTCCTGTGCACTGGGGTTA                  |
| <b>Genotyping primer: Mark 3-172-5'</b>  | CACTCCTTTTGACGGAGAGAA                  |
| <b>qPCR primers: Mark3-F</b>             | CCAAACAGTGACCTCAGCAA                   |
| <b>qPCR primers: ; Mark3-R</b>           | TCCACACCAGATGCTGTGTTA                  |
| <b>qPCR primers: 36B4-F</b>              | ACTGAGATTCGGGATATGCTGT                 |
| <b>qPCR primers: 36B4-R</b>              | TCCTAGACCAGTGTTCTGAGCTG                |
| <b>siRNA: Mark3_1, MARK3MSS206517</b>    | sense-strand=GGAGGAUGAGCUUAAGCCAUUUGUU |
| <b>siRNA: Mark3_2, MARK3MSS206518</b>    | sense-strand=GAGUCAGACCAGCACUGCAGAUAGU |

# Supplementary Figures

**Figure S1, related to Figure 1.** Modules 6 and 9 were not enriched for genes implicated by GWAS for a wide-range of phenotypes and diseases not directly related to bone.

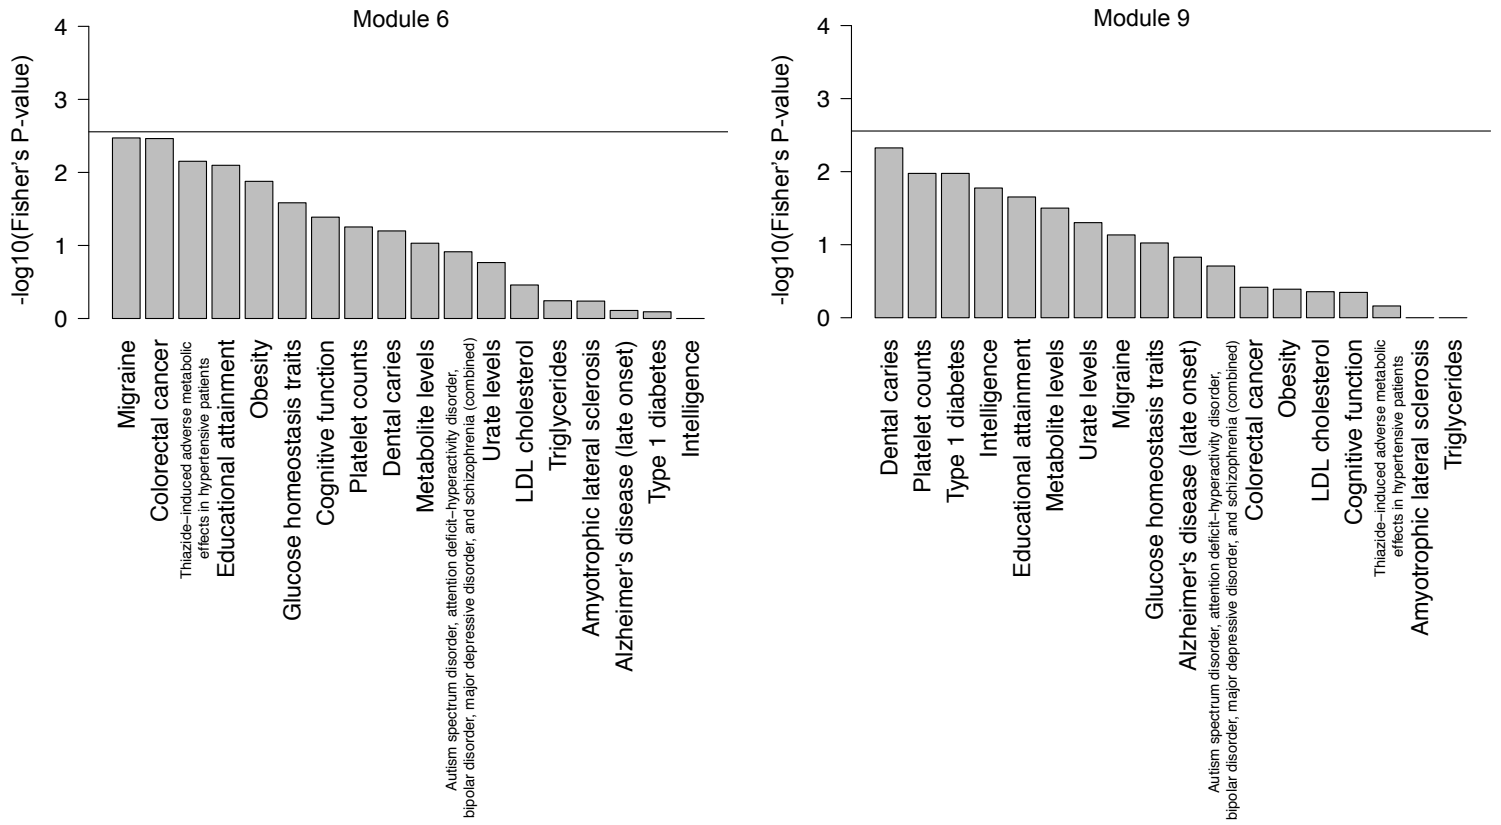

**Figure S2, realted to Figure 1.** The median correlation among OFM genes is higher than would be expected in random gene sets.

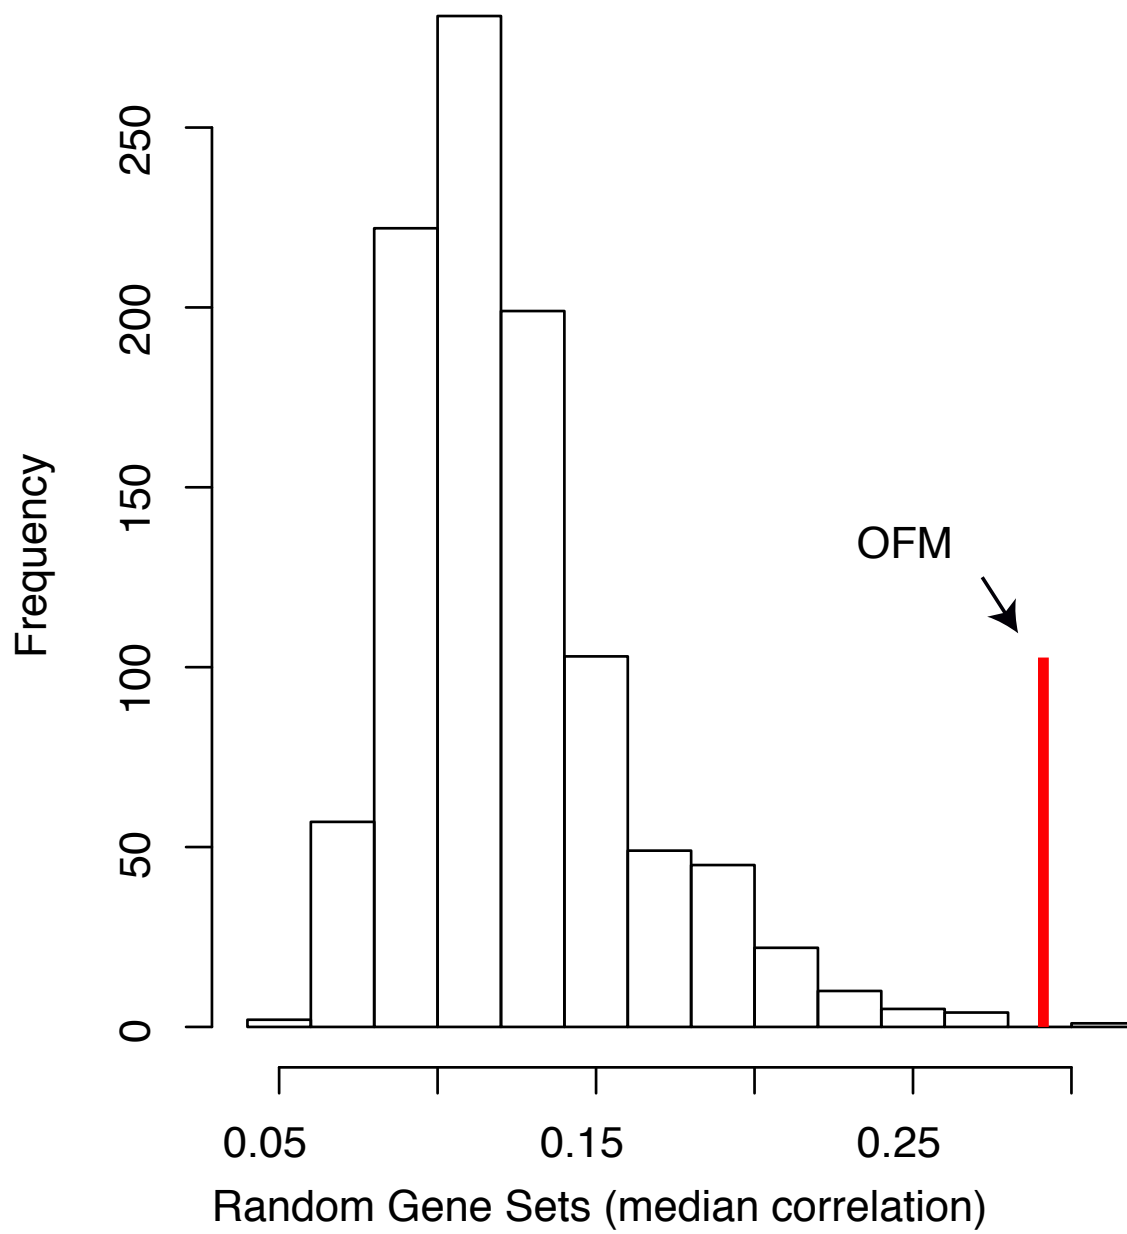

**Figure S3, related to Figure 4.** Expression profiles for *4930505A04Rik* and *Sptbn1*.

A) Expression of *4930505A04Rik* across 96 different mouse tissues and cell-types /cell-lines.

B) Expression of *4930505A04Rik* in purified osteoblasts across differentiation.

B) Expression of *Sptbn1* across 96 different mouse tissues and cell-types /cell-lines.

B) Expression of *Sptbn1* in purified osteoblasts across differentiation. Red boxes in A and C highlight gene expression in osteoblasts at day 5, 14 and 21 of osteogenic differentiation.

Data images in A and C were downloaded from <http://biogps.org>. Data in B and D are from GSE54461.

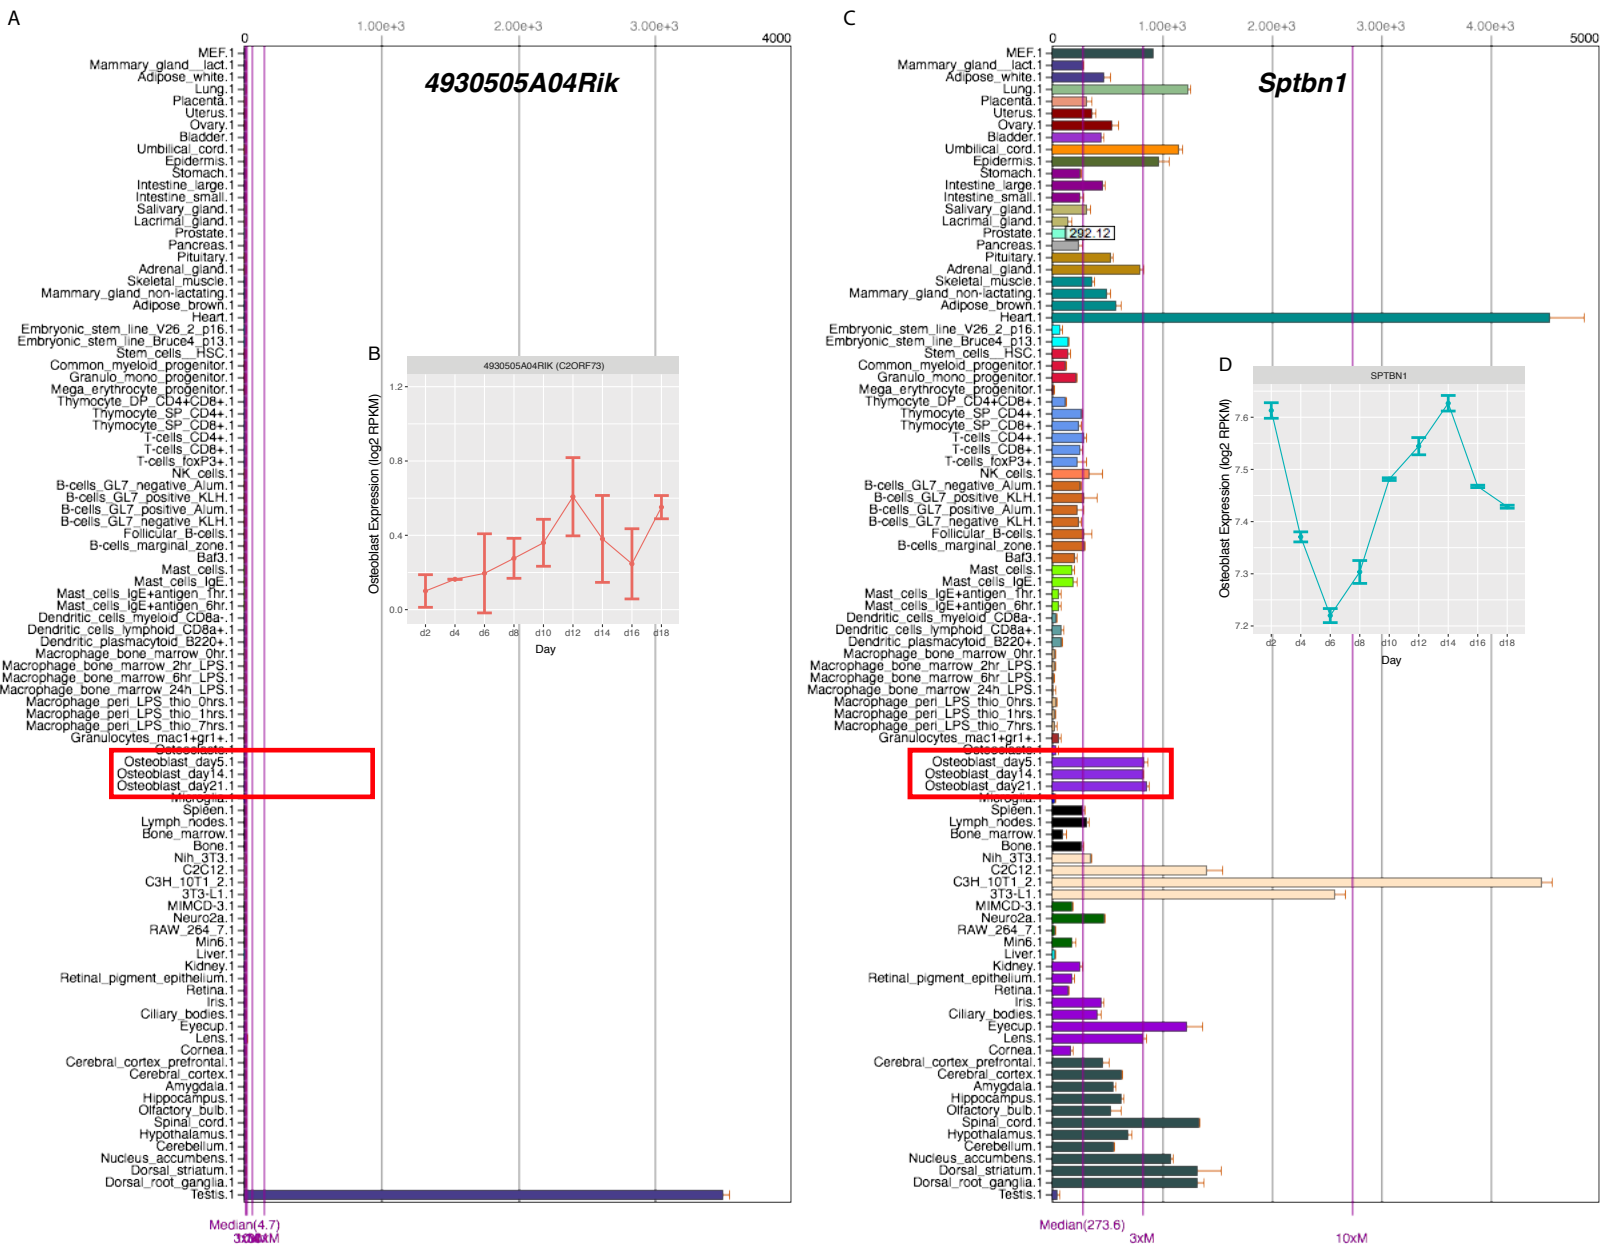

**Figure S4, related to Figure 5.** Expression profiles for *Mark3*. A) Expression of *Mark3* across 96 different mouse tissues and cell-types/cell-lines. Red box highlights gene expression in osteoblasts at day 5, 14 and 21 of osteogenic differentiation. Data were downloaded from <http://biogps.org>. B) Expression of *Mark3* in purified osteoblasts across differentiation. Data are from GSE54461. C) *Mark3* immunofluorescence in 3T3 osteoblasts. First panel = DAPI nuclear staining, second panel = *Mark3* staining, third panel = phalloidin staining for actin and fourth panel = merge. D) No staining with anti-MARK3 antibody can be seen in articular cartilage nor in growth plate chondrocytes (data not shown). In contrast, osteocytes in the bone at the cartilage-bone interface are well stained (see arrows). E) A seam of osteoid can be seen in contact with an island of bone marrow. Osteocytes are stained with anti-MARK3 antibody at the osteoid-bone interface as well as osteocytes deeper into the bone (see arrows). No staining with anti-MARK3 antibody above background can be visualized in any hematopoietic cells nor in bone marrow adipocytes (data not shown).

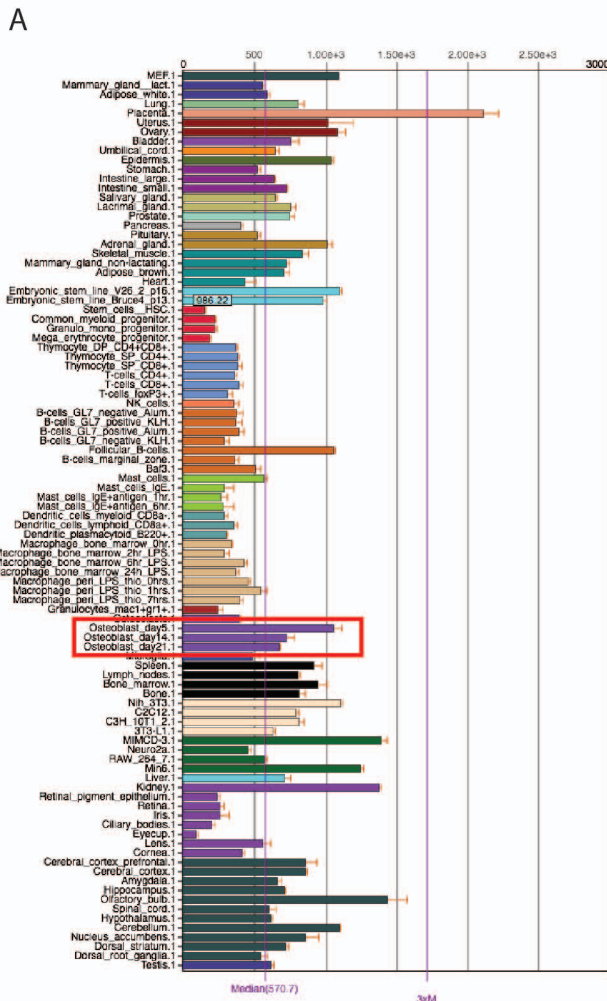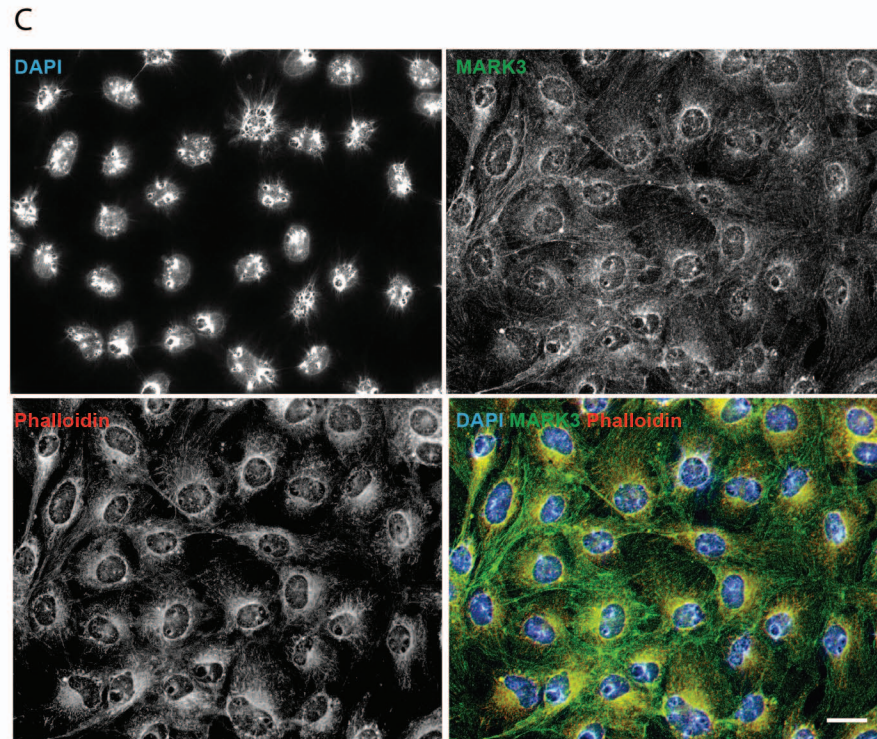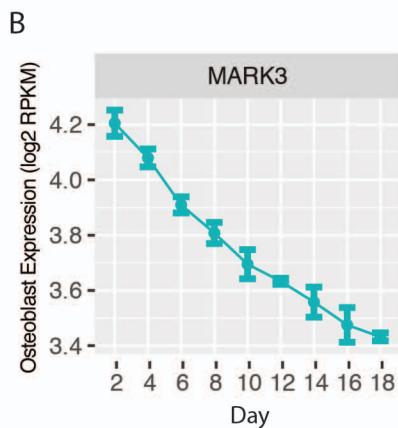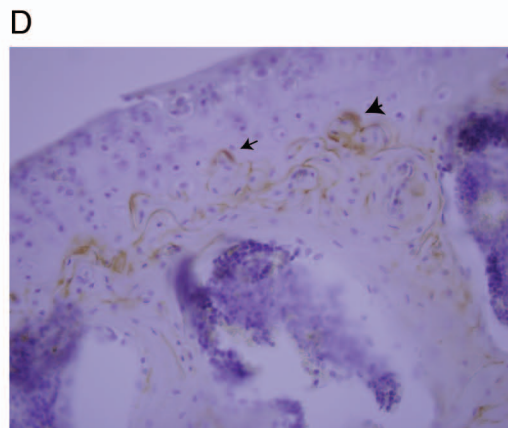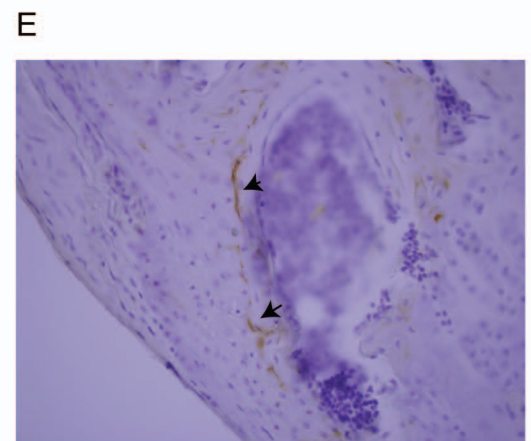

Supplement: NIHMS824818-supplement-2.pdf [file NIHMS824818-supplement-2.pdf]
